# Supplementary material for: A systematic review assessing the association of inflammatory markers with kidney dysfunction in people living with HIV on highly active antiretroviral therapy
Source: PubMed Central journal article supplement — BMC Infect Dis. 2024 Aug 2;24:776. doi: 10.1186/s12879-024-09594-5 (PMC11297709; doi:10.1186/s12879-024-09594-5), 2024-08-02
Supplement: 12879_2024_9594_MOESM2_ESM.pdf [file 12879_2024_9594_MOESM2_ESM.pdf]

|              |        |                                |
|--------------|--------|--------------------------------|
| Inflammation | kidney | HIV                            |
|              | Renal  | "human immunodeficiency virus" |
|              |        |                                |

### Search strategy (PUBMED) ()

(((((((inflammation[Transliterated Title]) OR (inflammation[Title/Abstract])) OR  
 (inflammation[Title])) OR (inflammation[Other Term])) OR (inflammation[MeSH Terms])) OR  
 (inflammation[MeSH Subheading])) OR (inflammation[MeSH Major Topic]) AND  
 (clinicaltrial[Filter])) AND (((((((((((((((kidney[Transliterated Title]) OR  
 (kidney[Title/Abstract])) OR (kidney[Title])) OR (kidney[Text Word])) OR (kidney[Other  
 Term])) OR (kidney[MeSH Terms])) OR (kidney[MeSH Subheading])) OR (kidney[MeSH Major  
 Topic])) OR (renal[Transliterated Title])) OR (renal[Title/Abstract])) OR (renal[Title])) OR  
 (renal[Text Word])) OR (renal[MeSH Terms])) OR (renal[Other Term])) OR (renal[MeSH  
 Subheading])) OR (renal[MeSH Major Topic]) AND (clinicaltrial[Filter])) AND  
 (((((((((((((((HIV[Transliterated Title]) OR (HIV[Title/Abstract])) OR (HIV[Text  
 Word])) OR (HIV[Other Term])) OR (HIV[MeSH Terms])) OR (HIV[MeSH Subheading])) OR  
 (HIV[MeSH Major Topic])) OR ("human immunodeficiency virus"[Transliterated Title])) OR  
 ("human immunodeficiency virus"[Title/Abstract])) OR ("human immunodeficiency  
 virus"[Title])) OR ("human immunodeficiency virus"[Text Word])) OR ("human  
 immunodeficiency virus"[Other Term])) OR ("human immunodeficiency virus"[MeSH  
 Terms])) OR ("human immunodeficiency virus"[MeSH Subheading])) OR ("human  
 immunodeficiency virus"[MeSH Major Topic]) AND (clinicaltrial[Filter]))

### SCOPUS (71 results)

TITLE-ABS-KEY(inflammation AND kidney AND HIV AND ( LIMIT-TO ( EXACTKEYWORD,"Clinical Article" ) ) )

### Google scholar (9 results)

allintitle: HIV renal inflammation
